# Supplementary material for: Cortical oscillations support sampling-based computations in spiking neural networks
Source: PubMed Central journal article supplement (PMC8947809; doi:10.1371/journal.pcbi.1009753), 2022-03-24

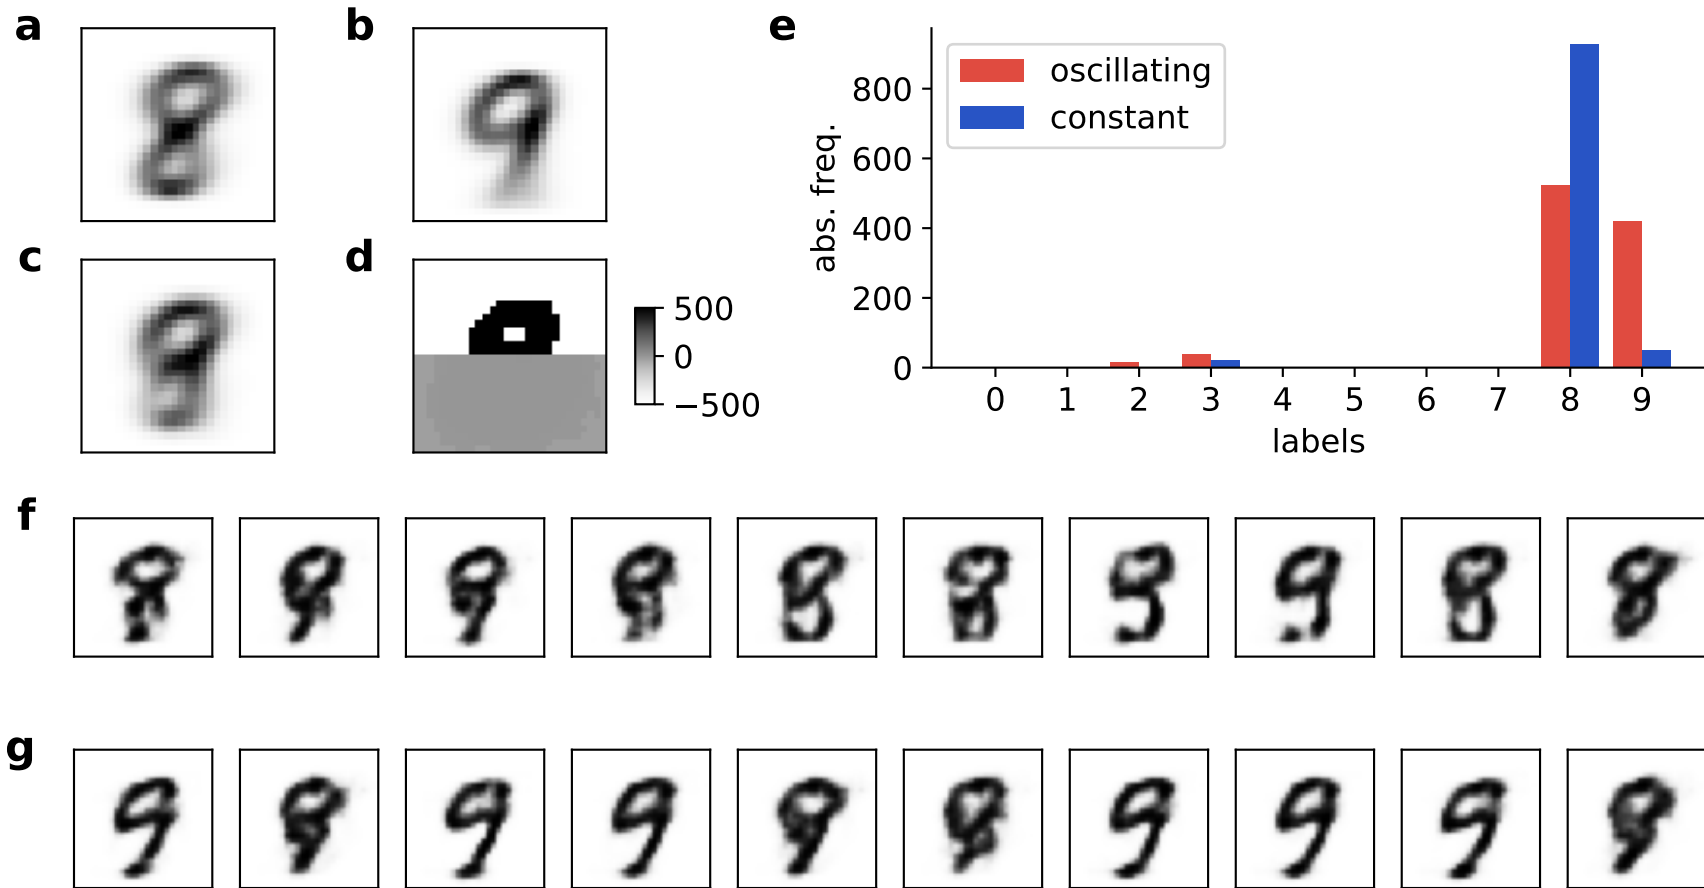

Supplement: pcbi.1009753.s005.pdf [file pcbi.1009753.s005.pdf]
